# Supplementary material for: First PET Imaging Studies With 63Zn-Zinc Citrate in Healthy Human Participants and Patients With Alzheimer Disease
Source: PubMed Central journal article supplement — Mol Imaging. 2016 Dec 9;15:1536012116673793. doi: 10.1177/1536012116673793 (PMC5469518; doi:10.1177/1536012116673793), 2016-12-09
Supplement: SupplementalInformation.pdf [file SupplementalInformation.pdf]

**Supplemental Information for:**

**First PET Imaging Studies with  $^{63}\text{Zn}$ -Zinc Citrate in Healthy Subjects and Alzheimer's Disease Patients**

Timothy R. DeGrado<sup>1</sup>, Bradley J. Kemp<sup>1</sup>, Mukesh K. Pandey<sup>1</sup>, Huailei Jiang<sup>1</sup>, Tina M. Gunderson, Logan R. Linscheid<sup>1</sup>, Allison R Woodwick<sup>1</sup>, Daniel M. McConnell<sup>1</sup>, Joel G Fletcher<sup>1</sup>, Geoffrey B. Johnson<sup>1</sup>, Ronald C. Petersen<sup>3</sup>, David S. Knopman<sup>3</sup>, Val J. Lowe<sup>1</sup>

<sup>1</sup>Department of Radiology, Mayo Clinic, Rochester MN, United States

<sup>2</sup>Department of Health Sciences Research, Mayo Clinic, Rochester MN, United States

<sup>3</sup>Department of Neurology, Mayo Clinic, Rochester MN, United States

Corresponding author:

Dr. Timothy R. DeGrado, PhD

Director, Molecular Imaging Research

Mayo Clinic

200 First Street SW

Rochester, MN 55905

(office) 507-538-4319

(FAX) 507-266-4461

(E-mail) [degrado.timothy@mayo.edu](mailto:degrado.timothy@mayo.edu)

**Table S1. SUVs of <sup>63</sup>Zn-zinc Citrate in Brain Regions at Early Time Points\***

| Tissue                | PET scan at 10-15 min |             | PET scan at 25-30 min |             |
|-----------------------|-----------------------|-------------|-----------------------|-------------|
|                       | Healthy Subjects      | AD Patients | Healthy Subjects      | AD Patients |
|                       | (n=6)                 | (n=6)       | (n=6)                 | (n=6)       |
| AD-global             | 0.497±0.050           | 0.443±0.084 | 0.422±0.049           | 0.390±0.080 |
| L parietal            | 0.456±0.047           | 0.399±0.073 | 0.392±0.039           | 0.355±0.077 |
| R parietal            | 0.472±0.045           | 0.426±0.067 | 0.398±0.041           | 0.378±0.078 |
| Cingulate precuneus   | 0.525±0.060           | 0.455±0.072 | 0.447±0.059           | 0.408±0.071 |
| L prefrontal cortex   | 0.475±0.051           | 0.401±0.047 | 0.422±0.088           | 0.370±0.082 |
| R prefrontal cortex   | 0.479±0.053           | 0.406±0.050 | 0.434±0.085           | 0.383±0.075 |
| Orbitofrontal         | 0.518±0.080           | 0.419±0.077 | 0.447±0.079           | 0.376±0.086 |
| L lateral temporal    | 0.515±0.050           | 0.427±0.047 | 0.444±0.085           | 0.379±0.082 |
| R lateral temporal    | 0.518±0.043           | 0.432±0.048 | 0.461±0.098           | 0.393±0.088 |
| Primary visual cortex | 0.624±0.059           | 0.543±0.067 | 0.557±0.116           | 0.508±0.103 |
| Cerebellum            | 0.599±0.055           | 0.517±0.057 | 0.560±0.116           | 0.497±0.104 |
| Anterior cingulate    | 0.497±0.069           | 0.405±0.065 | 0.397±0.091           | 0.329±0.094 |
| Occipital cortex      | 0.537±0.059           | 0.474±0.059 | 0.486±0.096           | 0.443±0.090 |
| L medial temporal     | 0.585±0.056           | 0.448±0.070 | 0.517±0.065           | 0.392±0.056 |
| R medial temporal     | 0.567±0.038           | 0.437±0.043 | 0.508±0.065           | 0.387±0.082 |
| Pons                  | 0.581±0.060           | 0.510±0.081 | 0.540±0.100           | 0.481±0.098 |

\*No statistically significant differences were found in comparing AD and healthy groups at these time points.

### Clinical Laboratory Tests for Safety of $^{63}\text{Zn}$ -zinc Citrate Administration

In order to assess the safety of administration of  $^{63}\text{Zn}$ -zinc citrate, venous blood samples were withdrawn prior to administration of  $^{63}\text{Zn}$ -zinc citrate and ~130 min post-injection. Table S2 shows the clinical laboratory tests performed on the samples, with pre- and post-administration values.

The vast majority of the clinical laboratory parameters were within the normal range, and those outside the range were largely consistent between pre- and post-administration values. The two diabetic subjects had abnormally high plasma glucose concentrations. Subject 9, who was obese (BMI=36.8), showed a number of abnormalities, but these were consistent between pre- and post-administration values.

Table S2. Clinical laboratory tests for safety assessment

| Laboratory test variable | units | Normal Range | Subject No. | Pre-administration Value | Post-Administration Value |
|--------------------------|-------|--------------|-------------|--------------------------|---------------------------|
| Albumin                  | g/dL  | 3.5-5.0      | 1           | 4.4                      | 3.9                       |
|                          |       |              | 2           | 4.6                      | 4.1                       |
|                          |       |              | 3           | 4.2                      | 3.7                       |
|                          |       |              | 4           | 4.7                      | 4.3                       |
|                          |       |              | 5           | 4.5                      | 4.4                       |
|                          |       |              | 6           | 4.1                      | 4.1                       |
|                          |       |              | 7           | 4.7                      | 4.3                       |
|                          |       |              | 8           | 5                        | 4.3                       |
|                          |       |              | 9           | 5.3                      | 4.5                       |
|                          |       |              | 10          | 4.1                      | 3.9                       |
|                          |       |              | 11          | 4.2                      | 3.7                       |
|                          |       |              | 12          | 4.7                      | 3.9                       |
| Alk. Phosphatase         | U/L   | 50-130       | 1           | 81                       | 82                        |
|                          |       |              | 2           | 74                       | 67                        |
|                          |       |              | 3           | 78                       | 70                        |
|                          |       |              | 4           | 93                       | 85                        |
|                          |       |              | 5           | 57                       | 58                        |
|                          |       |              | 6           | 55                       | 52                        |
|                          |       |              | 7           | 77                       | 72                        |
|                          |       |              | 8           | 61                       | 55                        |
|                          |       |              | 9           | 121                      | 96                        |
|                          |       |              | 10          | 54                       | 50                        |
|                          |       |              | 11          | 81                       | 77                        |
|                          |       |              | 12          | 100                      | 87                        |

Table S2 (cont.)

| Laboratory test variable | units               | Normal Range | Subject No. | Pre-administration Value | Post-Administration Value |
|--------------------------|---------------------|--------------|-------------|--------------------------|---------------------------|
| ALT (GPT)                | U/L                 | 7-45         | 1           | 49                       | 44                        |
|                          |                     |              | 2           | 17                       | 17                        |
|                          |                     |              | 3           | 23                       | 21                        |
|                          |                     |              | 4           | 21                       | 20                        |
|                          |                     |              | 5           | 26                       | 25                        |
|                          |                     |              | 6           | 19                       | 14                        |
|                          |                     |              | 7           | 24                       | 23                        |
|                          |                     |              | 8           | 35                       | 32                        |
|                          |                     |              | 9           | 22                       | 20                        |
|                          |                     |              | 10          | 12                       | 13                        |
|                          |                     |              | 11          | 14                       | 13                        |
|                          |                     |              | 12          | 22                       | 22                        |
| AST (GOT)                | U/L                 | 8-43         | 1           | 33                       | 33                        |
|                          |                     |              | 2           | 22                       | 23                        |
|                          |                     |              | 3           | 19                       | 17                        |
|                          |                     |              | 4           | 22                       | 19                        |
|                          |                     |              | 5           | 34                       | 29                        |
|                          |                     |              | 6           | 24                       | 27                        |
|                          |                     |              | 7           | 25                       | 23                        |
|                          |                     |              | 8           | 22                       | 24                        |
|                          |                     |              | 9           | 21                       | 16                        |
|                          |                     |              | 10          | 19                       | 19                        |
|                          |                     |              | 11          | 19                       | 18                        |
|                          |                     |              | 12          | 16                       | 15                        |
| Basophils                | X10 <sup>9</sup> /L | 0-0.03       | 1           | 0.03                     | 0.04                      |
|                          |                     |              | 2           | 0.02                     | 0.03                      |
|                          |                     |              | 3           | 0.01                     | 0.01                      |
|                          |                     |              | 4           | 0.03                     | 0.02                      |
|                          |                     |              | 5           | M                        | M                         |
|                          |                     |              | 6           | 0.03                     | 0.04                      |
|                          |                     |              | 7           | 0.03                     | 0.02                      |
|                          |                     |              | 8           | 0.02                     | 0.02                      |
|                          |                     |              | 9           | 0.03                     | 0.03                      |
|                          |                     |              | 10          | 0.02                     | 0.01                      |
|                          |                     |              | 11          | 0.01                     | 0                         |
|                          |                     |              | 12          | 0.01                     | 0.01                      |

Table S2 (cont.)

| Laboratory test variable  | units  | Normal Range | Subject No. | Pre-administration Value | Post-Administration Value |
|---------------------------|--------|--------------|-------------|--------------------------|---------------------------|
| Bicarbonate               | mmol/L | 22-29        | 1           | 25                       | 28                        |
|                           |        |              | 2           | 25                       | 24                        |
|                           |        |              | 3           | 28                       | 27                        |
|                           |        |              | 4           | 28                       | 28                        |
|                           |        |              | 5           | 28                       | 31                        |
|                           |        |              | 6           | 29                       | 25                        |
|                           |        |              | 7           | 28                       | 28                        |
|                           |        |              | 8           | 28                       | 28                        |
|                           |        |              | 9           | 25                       | 24                        |
|                           |        |              | 10          | 32                       | 27                        |
|                           |        |              | 11          | 30                       | 27                        |
|                           |        |              | 12          | 25                       | 24                        |
| Bilirubin                 | mg/dL  | 0.1-1.0      | 1           | 0.5                      | 0.5                       |
|                           |        |              | 2           | 0.4                      | 0.4                       |
|                           |        |              | 3           | 0.8                      | 0.6                       |
|                           |        |              | 4           | 0.5                      | 0.5                       |
|                           |        |              | 5           | 1.2                      | 1.1                       |
|                           |        |              | 6           | 0.6                      | 0.6                       |
|                           |        |              | 7           | 0.9                      | 0.9                       |
|                           |        |              | 8           | 0.4                      | 0.4                       |
|                           |        |              | 9           | 0.4                      | 0.3                       |
|                           |        |              | 10          | 0.4                      | 0.4                       |
|                           |        |              | 11          | 0.5                      | 0.5                       |
|                           |        |              | 12          | 0.4                      | 0.4                       |
| Blood Urea Nitrogen (BUN) | mg/dL  | 6-21         | 1           | 15                       | 14                        |
|                           |        |              | 2           | 15                       | 14                        |
|                           |        |              | 3           | 17                       | 15                        |
|                           |        |              | 4           | 16                       | 15                        |
|                           |        |              | 5           | 17                       | 16                        |
|                           |        |              | 6           | 16                       | 14                        |
|                           |        |              | 7           | 17                       | 15                        |
|                           |        |              | 8           | 15                       | 13                        |
|                           |        |              | 9           | 20                       | 17                        |
|                           |        |              | 10          | 13                       | 12                        |
|                           |        |              | 11          | 16                       | 14                        |
|                           |        |              | 12          | 15                       | 14                        |

Table S2 (cont.)

| Laboratory test variable | units | Normal Range | Subject No. | Pre-administration Value | Post-Administration Value |
|--------------------------|-------|--------------|-------------|--------------------------|---------------------------|
| Calcium                  | mg/dL | 8.9-10.1     | 1           | 9.7                      | 9.7                       |
|                          |       |              | 2           | 9.2                      | 9                         |
|                          |       |              | 3           | 9.5                      | 8.7                       |
|                          |       |              | 4           | 9.1                      | 9                         |
|                          |       |              | 5           | 9.1                      | 9.2                       |
|                          |       |              | 6           | 9.5                      | 9.2                       |
|                          |       |              | 7           | 9.7                      | 9.3                       |
|                          |       |              | 8           | 10                       | 9.4                       |
|                          |       |              | 9           | 10.9*                    | 9.7                       |
|                          |       |              | 10          | 9.2                      | 8.9                       |
|                          |       |              | 11          | 9.4                      | 9                         |
|                          |       |              | 12          | 9.7                      | 9                         |
| Chloride                 | mg/dL | 100-108      | 1           | 100                      | 108                       |
|                          |       |              | 2           | 99*                      | 104                       |
|                          |       |              | 3           | 101                      | 105                       |
|                          |       |              | 4           | 100                      | 104                       |
|                          |       |              | 5           | 98*                      | 100                       |
|                          |       |              | 6           | 103                      | 105                       |
|                          |       |              | 7           | 104                      | 107                       |
|                          |       |              | 8           | 100                      | 102                       |
|                          |       |              | 9           | 100                      | 103                       |
|                          |       |              | 10          | 102                      | 104                       |
|                          |       |              | 11          | 104                      | 107                       |
|                          |       |              | 12          | 100                      | 104                       |
| Cholesterol              | mg/dL |              | 1           | 244                      | 240                       |
|                          |       |              | 2           | 145                      | 130                       |
|                          |       |              | 3           | 199                      | 173                       |
|                          |       |              | 4           | 205                      | 187                       |
|                          |       |              | 5           | 116                      | 115                       |
|                          |       |              | 6           | 178                      | 174                       |
|                          |       |              | 7           | 209                      | 208                       |
|                          |       |              | 8           | 125                      | 118                       |
|                          |       |              | 9           | 185                      | 155                       |
|                          |       |              | 10          | 201                      | 196                       |
|                          |       |              | 11          | 209                      | 193                       |
|                          |       |              | 12          | 300                      | 275                       |

Table S2 (cont.)

| Laboratory test variable | units                | Normal Range | Subject No. | Pre-administration Value | Post-Administration Value |
|--------------------------|----------------------|--------------|-------------|--------------------------|---------------------------|
| Creatinine               | mg/dL                | 0.6-1.1      | 1           | 0.8                      | 0.7                       |
|                          |                      |              | 2           | 0.8                      | 0.8                       |
|                          |                      |              | 3           | 1                        | 0.9                       |
|                          |                      |              | 4           | 0.9                      | 0.9                       |
|                          |                      |              | 5           | 1                        | 1                         |
|                          |                      |              | 6           | 1.2                      | 1.1                       |
|                          |                      |              | 7           | 0.8                      | 0.8                       |
|                          |                      |              | 8           | 0.6                      | 0.6                       |
|                          |                      |              | 9           | 0.7                      | 0.6                       |
|                          |                      |              | 10          | 0.8                      | 0.7                       |
|                          |                      |              | 11          | 0.8                      | 0.8                       |
|                          |                      |              | 12          | 0.9                      | 0.9                       |
| Eosinophils              | X10 <sup>9</sup> /L  | 0.05-0.5     | 1           | 0.12                     | 0.11                      |
|                          |                      |              | 2           | 0.34                     | 0.3                       |
|                          |                      |              | 3           | 0.18                     | 0.18                      |
|                          |                      |              | 4           | 0.23                     | 0.19                      |
|                          |                      |              | 5           | M                        | M                         |
|                          |                      |              | 6           | 0.07                     | 0.06                      |
|                          |                      |              | 7           | 0.04*                    | 0.03*                     |
|                          |                      |              | 8           | 0.43                     | 0.32                      |
|                          |                      |              | 9           | 0.44                     | 0.31                      |
|                          |                      |              | 10          | 0.05                     | 0.07                      |
|                          |                      |              | 11          | 0.04*                    | 0.05                      |
|                          |                      |              | 12          | 0.07                     | 0.05                      |
| Erythrocytes             | X10 <sup>12</sup> /L | 3.9-5.03     | 1           | 4.63                     | 4.57                      |
|                          |                      |              | 2           | 3.91                     | 3.67*                     |
|                          |                      |              | 3           | 4.63                     | 4.29                      |
|                          |                      |              | 4           | 4.76                     | 4.49                      |
|                          |                      |              | 5           | 5.12*                    | 5.04*                     |
|                          |                      |              | 6           | 4.63                     | 4.72                      |
|                          |                      |              | 7           | 4.47                     | 4.49                      |
|                          |                      |              | 8           | 5.13*                    | 4.9                       |
|                          |                      |              | 9           | 4.75                     | 4.18                      |
|                          |                      |              | 10          | 4.17                     | 4.03                      |
|                          |                      |              | 11          | 4.7                      | 4.53                      |
|                          |                      |              | 12          | 4.56                     | 4.35                      |

Table S2 (cont.)

| Laboratory test variable | units | Normal Range | Subject No. | Pre-administration Value | Post-Administration Value |
|--------------------------|-------|--------------|-------------|--------------------------|---------------------------|
| G-Glutamylfrase          | U/L   | 6-29         | 1           | 73*                      | 71*                       |
|                          |       |              | 2           | 10                       | 10                        |
|                          |       |              | 3           | 24                       | 20                        |
|                          |       |              | 4           | 18                       | 16                        |
|                          |       |              | 5           | 16                       | 16                        |
|                          |       |              | 6           | 14                       | 13                        |
|                          |       |              | 7           | 10                       | 8                         |
|                          |       |              | 8           | 22                       | 19                        |
|                          |       |              | 9           | 16                       | 14                        |
|                          |       |              | 10          | 13                       | 12                        |
|                          |       |              | 11          | 26                       | 25                        |
|                          |       |              | 12          | 15                       | 14                        |
| Glucose                  | mg/dL | 70-100       | 1           | 75                       | 76                        |
|                          |       |              | 2           | 165*                     | 129*                      |
|                          |       |              | 3           | 99                       | 89                        |
|                          |       |              | 4           | 85                       | 81                        |
|                          |       |              | 5           | 83                       | 74                        |
|                          |       |              | 6           | 94                       | 92                        |
|                          |       |              | 7           | 92                       | 87                        |
|                          |       |              | 8           | 104*                     | 90                        |
|                          |       |              | 9           | 237*                     | 181*                      |
|                          |       |              | 10          | 93                       | 85                        |
|                          |       |              | 11          | 97                       | 84                        |
|                          |       |              | 12          | 92                       | 97                        |
| Hematocrit               | %     | 34.9-44.5    | 1           | 40.4                     | 40.5                      |
|                          |       |              | 2           | 36.2                     | 34*                       |
|                          |       |              | 3           | 41.7                     | 39.6                      |
|                          |       |              | 4           | 42.9                     | 40.3                      |
|                          |       |              | 5           | 44.5                     | 44                        |
|                          |       |              | 6           | 43.4                     | 43                        |
|                          |       |              | 7           | 42.4                     | 41.5                      |
|                          |       |              | 8           | 43.9                     | 43.3                      |
|                          |       |              | 9           | 41.9                     | 37.8                      |
|                          |       |              | 10          | 38.5                     | 37.1                      |
|                          |       |              | 11          | 41.7                     | 40.1                      |
|                          |       |              | 12          | 44.7*                    | 42.5                      |



Table S2 (cont.)

| Laboratory test variable | units | Normal Range | Subject No. | Pre-administration Value | Post-Administration Value |
|--------------------------|-------|--------------|-------------|--------------------------|---------------------------|
| Hemoglobin               | g/dL  | 12-15.5      | 1           | 13.4                     | 13.1                      |
|                          |       |              | 2           | 12.1                     | 11.4                      |
|                          |       |              | 3           | 14.3                     | 13.2                      |
|                          |       |              | 4           | 14.8                     | 13.9                      |
|                          |       |              | 5           | 16.2*                    | 16*                       |
|                          |       |              | 6           | 14.5                     | 14.8                      |
|                          |       |              | 7           | 13.7                     | 13.7                      |
|                          |       |              | 8           | 14.8                     | 14.3                      |
|                          |       |              | 9           | 14.6                     | 12.8                      |
|                          |       |              | 10          | 12.6                     | 12.1                      |
|                          |       |              | 11          | 14                       | 13.6                      |
|                          |       |              | 12          | 14.8                     | 13.9                      |
| IgA                      | mg/dL | 61-356       | 1           | 47*                      | 38*                       |
|                          |       |              | 2           | 197                      | 185                       |
|                          |       |              | 3           | 218                      | 180                       |
|                          |       |              | 4           | 258                      | 192                       |
|                          |       |              | 5           | 175                      | 168                       |
|                          |       |              | 6           | 137                      | 146                       |
|                          |       |              | 7           | 119                      | 118                       |
|                          |       |              | 8           | 267                      | 258                       |
|                          |       |              | 9           | 191                      | 163                       |
|                          |       |              | 10          | 72                       | 69                        |
|                          |       |              | 11          | 136                      | 151                       |
|                          |       |              | 12          | 147                      | 116                       |
| IgG                      | mg/dL | 767-1590     | 1           | 1090                     | 1010                      |
|                          |       |              | 2           | 1060                     | 943                       |
|                          |       |              | 3           | 702                      | 581*                      |
|                          |       |              | 4           | 1230                     | 967                       |
|                          |       |              | 5           | 1070                     | 1040                      |
|                          |       |              | 6           | 821                      | 822                       |
|                          |       |              | 7           | 1140                     | 1050                      |
|                          |       |              | 8           | 987                      | 980                       |
|                          |       |              | 9           | 971                      | 798                       |
|                          |       |              | 10          | 660*                     | 618*                      |
|                          |       |              | 11          | 1010                     | 943                       |
|                          |       |              | 12          | 811                      | 690*                      |

Table S2 (cont.)

| Laboratory test variable | units               | Normal Range | Subject No. | Pre-administration Value | Post-Administration Value |
|--------------------------|---------------------|--------------|-------------|--------------------------|---------------------------|
| IgM                      | mg/dL               | 37-286       | 1           | 86                       | 77                        |
|                          |                     |              | 2           | 78                       | 70                        |
|                          |                     |              | 3           | 45                       | 34*                       |
|                          |                     |              | 4           | 132                      | 130                       |
|                          |                     |              | 5           | 55                       | 55                        |
|                          |                     |              | 6           | 56                       | 55                        |
|                          |                     |              | 7           | 74                       | 66                        |
|                          |                     |              | 8           | 91                       | 86                        |
|                          |                     |              | 9           | 94                       | 82                        |
|                          |                     |              | 10          | 55                       | 48                        |
|                          |                     |              | 11          | 93                       | 90                        |
|                          |                     |              | 12          | 62                       | 50                        |
| Leukocytes               | X10 <sup>9</sup> /L | 3.5-10.5     | 1           | 4.6                      | 5.5                       |
|                          |                     |              | 2           | 5.7                      | 5.5                       |
|                          |                     |              | 3           | 5.6                      | 5.7                       |
|                          |                     |              | 4           | 4.3                      | 4.3                       |
|                          |                     |              | 5           | 5.5                      | 6                         |
|                          |                     |              | 6           | 5.2                      | 5.2                       |
|                          |                     |              | 7           | 5.3                      | 4.5                       |
|                          |                     |              | 8           | 6.9                      | 6.9                       |
|                          |                     |              | 9           | 9.2                      | 7                         |
|                          |                     |              | 10          | 3.5                      | 3.4                       |
|                          |                     |              | 11          | 6.7                      | 6.7                       |
|                          |                     |              | 12          | 5.3                      | 5.4                       |
| Lymphocytes              | x10 <sup>9</sup> /L | 0.9-2.9      | 1           | 1.61                     | 1.52                      |
|                          |                     |              | 2           | 1.7                      | 1.88                      |
|                          |                     |              | 3           | 1.88                     | 1.8                       |
|                          |                     |              | 4           | 1.48                     | 1.71                      |
|                          |                     |              | 5           | M                        | M                         |
|                          |                     |              | 6           | 1                        | 1.03                      |
|                          |                     |              | 7           | 1.3                      | 1.21                      |
|                          |                     |              | 8           | 2.87                     | 2.68                      |
|                          |                     |              | 9           | 2.49                     | 2.12                      |
|                          |                     |              | 10          | 1.02                     | 1.18                      |
|                          |                     |              | 11          | 1.59                     | 1.92                      |
|                          |                     |              | 12          | 1.75                     | 1.73                      |

Table S2 (cont.)

| Laboratory test variable                 | units   | Normal Range | Subject No. | Pre-administration Value | Post-Administration Value |
|------------------------------------------|---------|--------------|-------------|--------------------------|---------------------------|
| Magnesium                                | mg/dL   | 1.7-2.3      | 1           | 1.9                      | 2                         |
|                                          |         |              | 2           | 1.4*                     | 1.3*                      |
|                                          |         |              | 3           | 2.2                      | 2.1                       |
|                                          |         |              | 4           | 2.1                      | 1.9                       |
|                                          |         |              | 5           | 2                        | 1.9                       |
|                                          |         |              | 6           | 2.1                      | 2                         |
|                                          |         |              | 7           | 2                        | 1.9                       |
|                                          |         |              | 8           | 2.1                      | 2.2                       |
|                                          |         |              | 9           | 1.5*                     | 1.4*                      |
|                                          |         |              | 10          | 2.1                      | 2.2                       |
|                                          |         |              | 11          | 2                        | 2.1                       |
|                                          |         |              | 12          | 1.6*                     | 1.5*                      |
| Mean Corpuscular Hemoglobin (MCH)        | pg/cell | 27-31        | 1           | 28.9                     | 28.7                      |
|                                          |         |              | 2           | 30.9                     | 31.1                      |
|                                          |         |              | 3           | 30.96                    | 30.8                      |
|                                          |         |              | 4           | 31.1                     | 31.0                      |
|                                          |         |              | 5           | 31.6                     | 31.7                      |
|                                          |         |              | 6           | 31.3                     | 31.4                      |
|                                          |         |              | 7           | 30.6                     | 30.5                      |
|                                          |         |              | 8           | 28.8                     | 29.2                      |
|                                          |         |              | 9           | 30.7                     | 30.6                      |
|                                          |         |              | 10          | 30.2                     | 30.0                      |
|                                          |         |              | 11          | 29.8                     | 30.0                      |
|                                          |         |              | 12          | 32.5*                    | 32.0                      |
| Mean Corpuscular Hemoglobin Conc. (MCHC) | g/dL    | 32-36        | 1           | 33.2                     | 32.3                      |
|                                          |         |              | 2           | 33.4                     | 33.5                      |
|                                          |         |              | 3           | 34.3                     | 33.3                      |
|                                          |         |              | 4           | 34.5                     | 34.5                      |
|                                          |         |              | 5           | 36.4                     | 36.4                      |
|                                          |         |              | 6           | 33.4                     | 34.4                      |
|                                          |         |              | 7           | 32.3                     | 33.0                      |
|                                          |         |              | 8           | 33.7                     | 33.0                      |
|                                          |         |              | 9           | 34.8                     | 33.9                      |
|                                          |         |              | 10          | 31.7                     | 32.6                      |
|                                          |         |              | 11          | 33.6                     | 33.9                      |
|                                          |         |              | 12          | 33.1                     | 32.7                      |

Table S2 (cont.)

| Laboratory test variable      | units               | Normal Range | Subject No. | Pre-administration Value | Post-Administration Value |
|-------------------------------|---------------------|--------------|-------------|--------------------------|---------------------------|
| Mean Corpuscular Volume (MCV) | fL                  | 81.6-98.3    | 1           | 87.3                     | 88.6                      |
|                               |                     |              | 2           | 92.6                     | 92.6                      |
|                               |                     |              | 3           | 90.1                     | 92.3                      |
|                               |                     |              | 4           | 90.1                     | 89.8                      |
|                               |                     |              | 5           | 86.9                     | 87.3                      |
|                               |                     |              | 6           | 93.7                     | 91.1                      |
|                               |                     |              | 7           | 94.9                     | 92.4                      |
|                               |                     |              | 8           | 85.6                     | 88.4                      |
|                               |                     |              | 9           | 88.2                     | 90.4                      |
|                               |                     |              | 10          | 92.3                     | 92.1                      |
|                               |                     |              | 11          | 88.7                     | 88.5                      |
|                               |                     |              | 12          | 98                       | 97.7                      |
| Monocytes                     | x10 <sup>9</sup> /L | 0.3-0.9      | 1           | 0.29*                    | 0.24*                     |
|                               |                     |              | 2           | 0.6                      | M                         |
|                               |                     |              | 3           | 0.62                     | 0.56                      |
|                               |                     |              | 4           | 0.38                     | 0.35                      |
|                               |                     |              | 5           | M                        | M                         |
|                               |                     |              | 6           | 0.51                     | 0.46                      |
|                               |                     |              | 7           | 0.32                     | 0.4                       |
|                               |                     |              | 8           | 0.35                     | 0.32                      |
|                               |                     |              | 9           | 0.78                     | 0.54                      |
|                               |                     |              | 10          | 0.27                     | 0.31                      |
|                               |                     |              | 11          | 0.54                     | 0.62                      |
|                               |                     |              | 12          | 0.57                     | 0.47                      |
| Neutrophils                   | x10 <sup>9</sup> /L | 1.7-7.0      | 1           | 2.53                     | 3.56                      |
|                               |                     |              | 2           | 2.72                     | 2.9                       |
|                               |                     |              | 3           | 2.93                     | 3.18                      |
|                               |                     |              | 4           | 2.15                     | 2.05                      |
|                               |                     |              | 5           | M                        | M                         |
|                               |                     |              | 6           | 3.57                     | 3.62                      |
|                               |                     |              | 7           | 3.64                     | 2.84                      |
|                               |                     |              | 8           | 3.21                     | 3.56                      |
|                               |                     |              | 9           | 5.41                     | 3.95                      |
|                               |                     |              | 10          | 2.16                     | 1.84                      |
|                               |                     |              | 11          | 4.48                     | 4.11                      |
|                               |                     |              | 12          | 2.93                     | 3.11                      |

Table S2 (cont.)

| Laboratory test variable | units               | Normal Range | Subject No. | Pre-administration Value | Post-Administration Value |
|--------------------------|---------------------|--------------|-------------|--------------------------|---------------------------|
| Phosphorus               | mg/dL               | 2.5-4.5      | 1           | 3.5                      | 3.2                       |
|                          |                     |              | 2           | 2.9                      | M                         |
|                          |                     |              | 3           | 2.9                      | 3.2                       |
|                          |                     |              | 4           | 2.8                      | 2.7                       |
|                          |                     |              | 5           | 3.1                      | 2.9                       |
|                          |                     |              | 6           | 3.3                      | 3.3                       |
|                          |                     |              | 7           | 3.8                      | 3.5                       |
|                          |                     |              | 8           | 3.5                      | 3.6                       |
|                          |                     |              | 9           | 3.1                      | 2.6                       |
|                          |                     |              | 10          | 4.1                      | 3.7                       |
|                          |                     |              | 11          | 4.1                      | 3.7                       |
|                          |                     |              | 12          | 3.5                      | 3.0                       |
| Platelet Count           | x10 <sup>9</sup> /L | 150-450      | 1           | 248                      | 257                       |
|                          |                     |              | 2           | 255                      | 244                       |
|                          |                     |              | 3           | 329                      | 291                       |
|                          |                     |              | 4           | 170                      | 163                       |
|                          |                     |              | 5           | 215                      | 199                       |
|                          |                     |              | 6           | 189                      | 185                       |
|                          |                     |              | 7           | 255                      | 245                       |
|                          |                     |              | 8           | 222                      | 221                       |
|                          |                     |              | 9           | 337                      | 271                       |
|                          |                     |              | 10          | 182                      | 179                       |
|                          |                     |              | 11          | 248                      | 237                       |
|                          |                     |              | 12          | 277                      | 242                       |
| Potassium                | mmol/L              | 3.6-5.2      | 1           | 5.3*                     | 4.6                       |
|                          |                     |              | 2           | 4.5                      | 4.7                       |
|                          |                     |              | 3           | 4.3                      | 4.4                       |
|                          |                     |              | 4           | 4.8                      | 4.9                       |
|                          |                     |              | 5           | 3.7                      | 3.7                       |
|                          |                     |              | 6           | 5.4*                     | 4.5                       |
|                          |                     |              | 7           | 4.9                      | 4.2                       |
|                          |                     |              | 8           | 4.3                      | 4.2                       |
|                          |                     |              | 9           | 5.4*                     | 5.3*                      |
|                          |                     |              | 10          | 4.5                      | 4.3                       |
|                          |                     |              | 11          | 4.2                      | 4.3                       |
|                          |                     |              | 12          | 4                        | 3.8                       |

Table S2 (cont.)

| Laboratory test variable | units  | Normal Range | Subject No. | Pre-administration Value | Post-Administration Value |
|--------------------------|--------|--------------|-------------|--------------------------|---------------------------|
| Protein, Total           | g/dL   | 6.3-7.9      | 1           | 6.5                      | 6.2*                      |
|                          |        |              | 2           | 6.8                      | 6.3                       |
|                          |        |              | 3           | 6.5                      | 5.4*                      |
|                          |        |              | 4           | 7.2                      | 6.4                       |
|                          |        |              | 5           | 6.9                      | 6.7                       |
|                          |        |              | 6           | 6.2*                     | 5.9                       |
|                          |        |              | 7           | 6.8                      | 6.5                       |
|                          |        |              | 8           | 7.4                      | 6.9                       |
|                          |        |              | 9           | 8*                       | 6.6                       |
|                          |        |              | 10          | 6                        | 5.7                       |
|                          |        |              | 11          | 6.4                      | 5.8                       |
|                          |        |              | 12          | 7.1                      | 6.5                       |
| Sodium                   | mmol/L | 135-145      | 1           | 140                      | 145                       |
|                          |        |              | 2           | 137                      | 138                       |
|                          |        |              | 3           | 138                      | 140                       |
|                          |        |              | 4           | 138                      | 140                       |
|                          |        |              | 5           | 139                      | 140                       |
|                          |        |              | 6           | 141                      | 142                       |
|                          |        |              | 7           | 144                      | 145                       |
|                          |        |              | 8           | 139                      | 141                       |
|                          |        |              | 9           | 140                      | 141                       |
|                          |        |              | 10          | 141                      | 142                       |
|                          |        |              | 11          | 142                      | 143                       |
|                          |        |              | 12          | 142                      | 144                       |
| Triglycerides            | mg/dL  |              | 1           | 88                       | 74                        |
|                          |        |              | 2           | 109                      | 92                        |
|                          |        |              | 3           | 137                      | 130                       |
|                          |        |              | 4           | 193                      | 165                       |
|                          |        |              | 5           | 87                       | 82                        |
|                          |        |              | 6           | 66                       | 57                        |
|                          |        |              | 7           | 112                      | 98                        |
|                          |        |              | 8           | 92                       | 78                        |
|                          |        |              | 9           | 219                      | 216                       |
|                          |        |              | 10          | 64                       | 64                        |
|                          |        |              | 11          | 67                       | 61                        |
|                          |        |              | 12          | 289                      | 245                       |

Table S2 (cont.)

| Laboratory test variable | units | Normal Range | Subject No. | Pre-administration Value | Post-Administration Value |
|--------------------------|-------|--------------|-------------|--------------------------|---------------------------|
| Tryptase                 | ng/mL | <11.5        | 1           | 2.5                      | 2.1                       |
|                          |       |              | 2           | 5.1                      | 4.4                       |
|                          |       |              | 3           | 6                        | 4.6                       |
|                          |       |              | 4           | 3.3                      | 2.9                       |
|                          |       |              | 5           | 1.3                      | 1.1                       |
|                          |       |              | 6           | 3.5                      | 3.2                       |
|                          |       |              | 7           | 3.7                      | 3.2                       |
|                          |       |              | 8           | 3.5                      | 3.3                       |
|                          |       |              | 9           | 5.1                      | 4.9                       |
|                          |       |              | 10          | 3                        | 2.6                       |
|                          |       |              | 11          | 4.4                      | 4.6                       |
|                          |       |              | 12          | 4.2                      | 3.9                       |
| Uric Acid                | mg/dL | 2.7-6.1      | 1           | 6.1                      | 6.4*                      |
|                          |       |              | 2           | 4.2                      | M                         |
|                          |       |              | 3           | 5.4                      | 5.4                       |
|                          |       |              | 4           | 6.2*                     | 6                         |
|                          |       |              | 5           | 8*                       | 7.8*                      |
|                          |       |              | 6           | 5.4                      | 5.1                       |
|                          |       |              | 7           | 4.4                      | 4.4                       |
|                          |       |              | 8           | 5.8                      | 5.7                       |
|                          |       |              | 9           | 8.7*                     | 8.5*                      |
|                          |       |              | 10          | 5.1                      | 4.8                       |
|                          |       |              | 11          | 4.4                      | 4.4                       |
|                          |       |              | 12          | 7.3*                     | 6.9*                      |

## Vital Signs Before and After Administration of $^{63}\text{Zn}$ -zinc Citrate

### 1. Temperature

Body temperatures were measured prior to administration of  $^{63}\text{Zn}$ -zinc citrate and at 115 min post-injection. Table S3 shows body temperatures. No significant changes were observed.

Table S3. Body temperatures ( $^{\circ}\text{C}$ )

| Subject No. | Pre-administration Value | Post-Administration Value |
|-------------|--------------------------|---------------------------|
| 1           | 35.5                     | 35.8                      |
| 2           | 36.4                     | 36.6                      |
| 3           | 35.4                     | 35.5                      |
| 4           | 36.7                     | 36.4                      |
| 5           | 36.9                     | 36.7                      |
| 6           | 36.3                     | 36.4                      |
| 7           | 36.7                     | 36.6                      |
| 8           | 36.5                     | 36.5                      |
| 9           | 36.8                     | 36.8                      |
| 10          | 35                       | 34.6                      |
| 11          | 36.6                     | 36.8                      |
| 12          | 36.4                     | 36.4                      |

### 2. Heart rate

Heart rates were measured prior to administration of  $^{63}\text{Zn}$ -zinc citrate and at 30, 70, and 115 min post-injection. Table S4 shows heart rates. Although small differences in heart rate were measured across time, no dramatic effects on heart rate were observed.

Table S3. Heart rates (BPM)

| Subject No. | Pre-administration Value | 30 min p.i. | 70 min p.i. | 115 min p.i. |
|-------------|--------------------------|-------------|-------------|--------------|
| 1           | 66                       | 71          | 69          | 78           |
| 2           | 71                       | 74          | 77          | 77           |
| 3           | 58                       | 60          | 58          | 57           |
| 4           | 57                       | 52          | 54          | 57           |
| 5           | 43                       | 41          | 44          | 63           |
| 6           | 52                       | 52          | 51          | 56           |
| 7           | 65                       | 63          | 71          | 67           |
| 8           | 65                       | 63          | 62          | 57           |
| 9           | 78                       | 71          | 72          | 73           |
| 10          | 52                       | 51          | 50          | 50           |
| 11          | 69                       | 64          | 65          | 62           |
| 12          | 73                       | 77          | 64          | 71           |



### 3. Blood pressures

Blood pressures were measured prior to administration of  $^{63}\text{Zn}$ -zinc citrate and at 30, 70, and 115 min post-injection. Table S5 shows blood pressures. Subject 4 showed small changes from pre-injection to 30 min p.i. value, but diastolic pressure dropped from 86 to 61 mm Hg at the 70 min time point. Subject 11 showed a depression in blood pressures after administration of  $^{63}\text{Zn}$ -zinc citrate. It is possible that this patient had not yet reached a resting state when the initial measurements were taken.

Table S5. Blood pressures (Systolic/diastolic, mm Hg)

| Subject No. | Pre-administration Values | 30 min p.i. | 70 min p.i. | 115 min p.i. |
|-------------|---------------------------|-------------|-------------|--------------|
| 1           | 140/77                    | 144/74      | 146/76      | 148/84       |
| 2           | 155/75                    | 156/75      | 161/80      | 154/77       |
| 3           | 161/83                    | 145/88      | 144/88      | 143/90       |
| 4           | 136/80                    | 129/86      | M           | 122/78       |
| 5           | 139/65                    | 143/69      | 134/66      | 123/65       |
| 6           | 170/73                    | 173/67      | 156/70      | 156/78       |
| 7           | 144/61                    | 125/62      | 139/65      | 123/60       |
| 8           | 125/67                    | 102/60      | 117/71      | 116/67       |
| 9           | 101/52                    | 126/63      | 112/59      | 119/66       |
| 10          | 174/78                    | 160/70      | 168/91      | 178/80       |
| 11          | 173/86                    | 147/65*     | 162/65*     | 140/74       |
| 12          | 141/66                    | 174/76      | 152/62      | 131/59       |

#### 4. Respiratory rate

Respiratory rates were measured prior to administration of  $^{63}\text{Zn}$ -zinc citrate and at 30, 70, and 115 min post-injection. Table S6 shows respiratory rates. Respiratory rates were increased greater than  $4 \text{ min}^{-1}$  in two subjects at the 30 min time point (Subjects 1 and 8).

Table S6. Respiratory rates ( $\text{min}^{-1}$ )

| Subject No. | Pre-administration Values | 30 min p.i. | 70 min p.i. | 115 min p.i. |
|-------------|---------------------------|-------------|-------------|--------------|
| 1           | 16                        | 25          | 25          | 25           |
| 2           | 25                        | 20          | 24          | 20           |
| 3           | 25                        | 20          | 16          | 16           |
| 4           | 18                        | 18          | 16          | 17           |
| 5           | 20                        | 20          | 21          | 19           |
| 6           | 16                        | 12          | 12          | 12           |
| 7           | 20                        | 20          | 16          | 20           |
| 8           | 20                        | 25          | 18          | 19           |
| 9           | 18                        | 18          | 18          | 24           |
| 10          | 15                        | 17          | 15          | 16           |
| 11          | 20                        | 20          | 19          | 21           |
| 12          | 18                        | 20          | 19          | 20           |
